# Supplementary material for: From plants to ants: Fungal modification of leaf lipids for nutrition and communication in the leaf-cutter ant fungal garden ecosystem
Source: bioRxiv or medRxiv preprint supplement (doi:10.1101/2020.07.28.224139), 2021-01-15
Supplement: Supplementary file [file media-1.pdf]

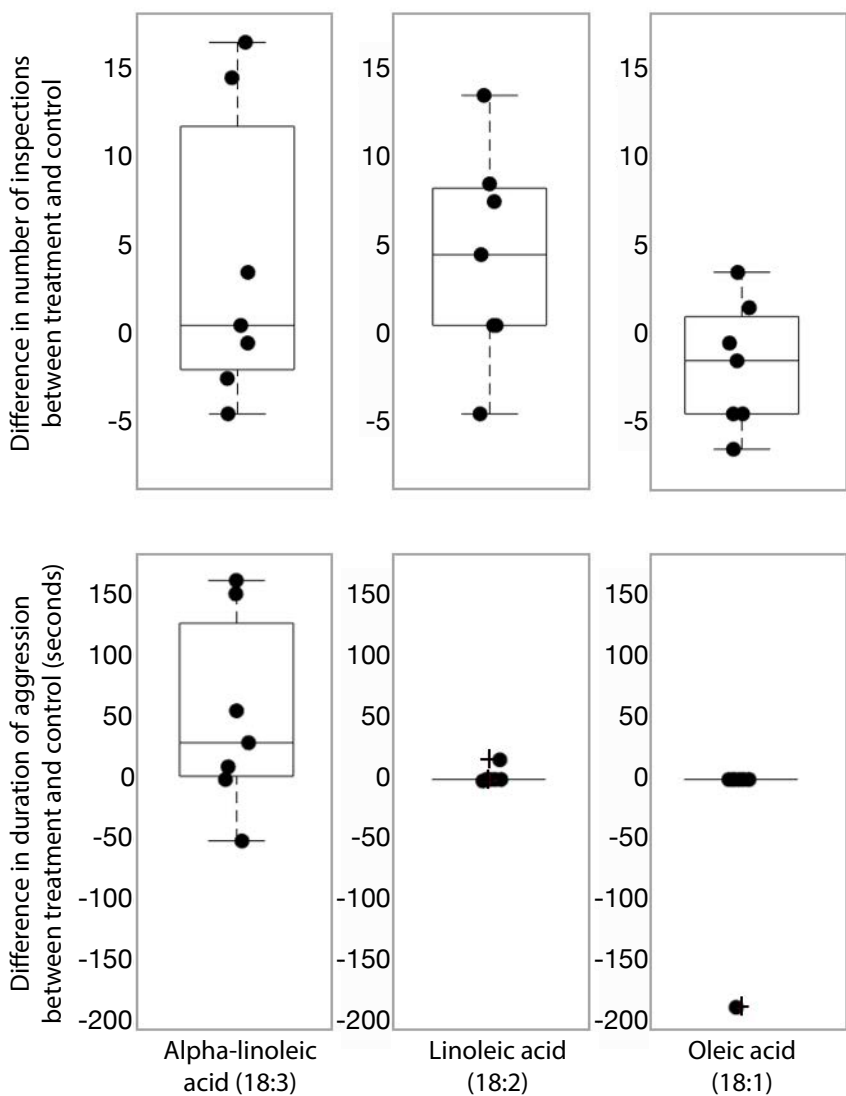

**Figure S1: Results of the behavior experiment.** Similar to the boxplots in Figure 4, each point represents one experimental replicate, where the values for the control count or duration are subtracted from the treatment count or duration. Here the difference in the number of inspections as well as the difference in duration of aggressions are displayed. Again, a one sample t-tests was conducted for the time-based comparison and a one sample test of proportions was conducted for the difference in counts. Neither were found to be significantly different between treatments at a p-value threshold of 0.05. Box plot definitions: center line – median, upper and lower box limits – upper and lower quartiles, whiskers – 1.5 x inter-quartile range, outliers – any points outside the 1.5x inter-quartile range.
