# Supplementary material for: From plants to ants: Fungal modification of leaf lipids for nutrition and communication in the leaf-cutter ant fungal garden ecosystem
Source: bioRxiv or medRxiv preprint supplement (doi:10.1101/2020.07.28.224139), 2021-01-15
Supplement: Supplementary file [file media-2.pdf]

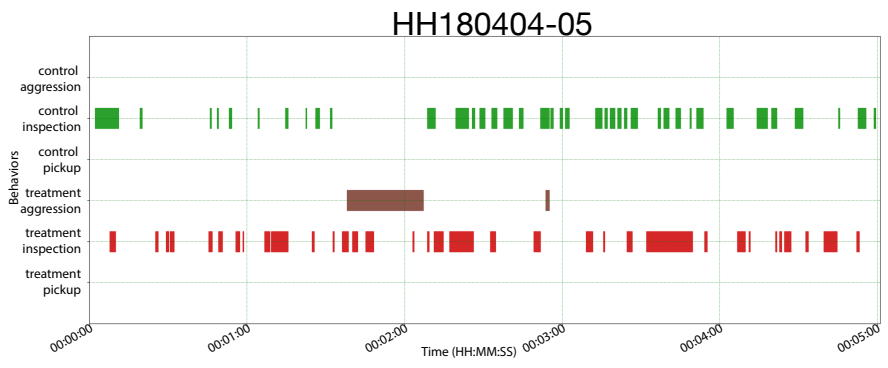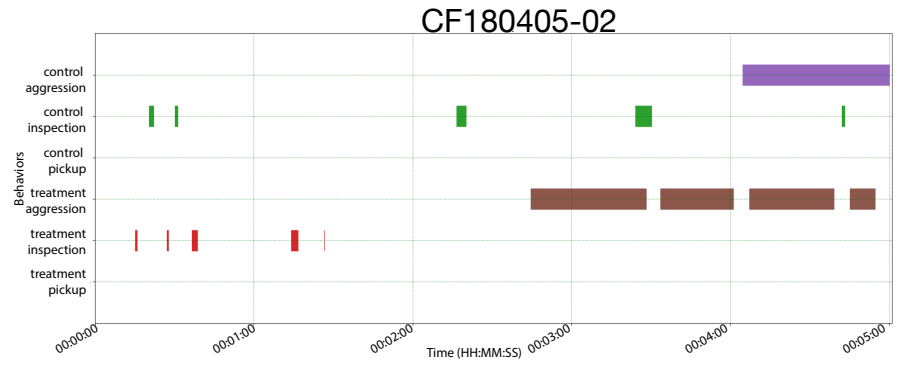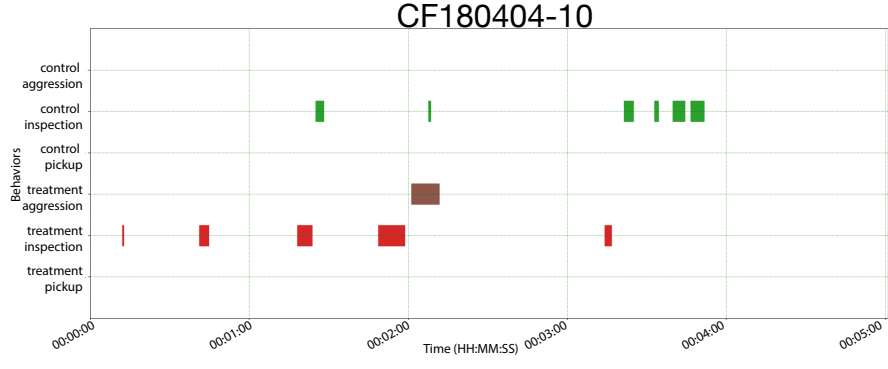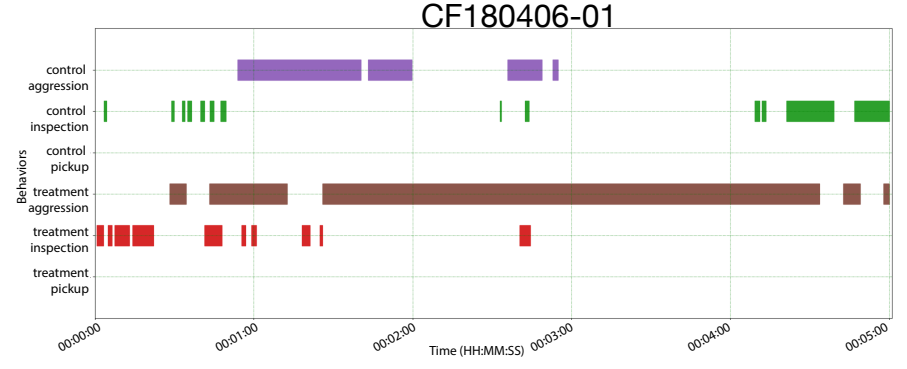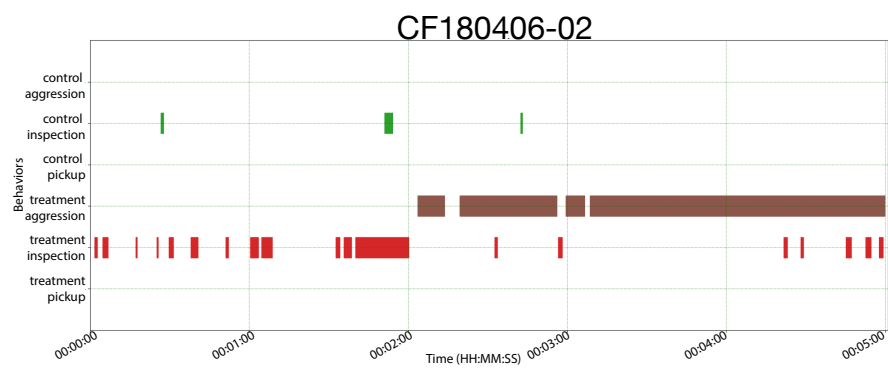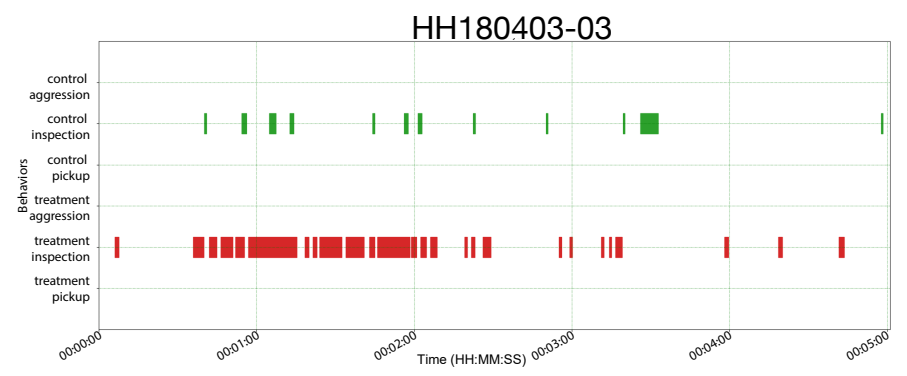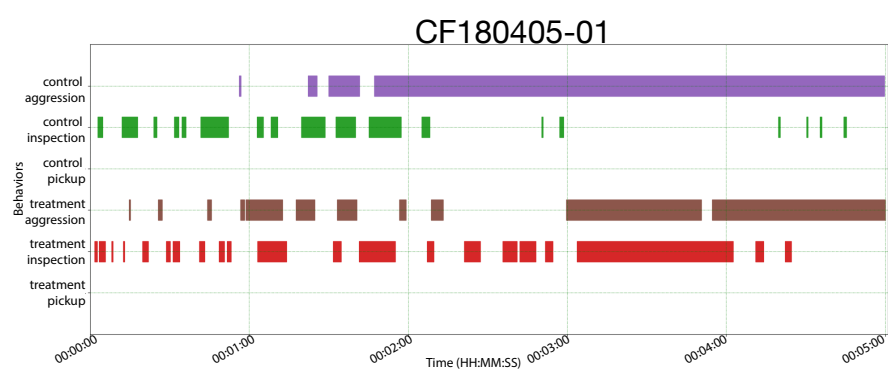

**Figure S2: Atta ant behavior in response to alpha-linolenic acid (18:3) in comparison to control.** Labels above panels represent the different colonies that were tested. Tracks represent the times of event occurrences and their durations.
